# Supplementary material
Source: PubMed Central journal article supplement (PMC4040957)
Supplement: NIHMS590233-supplement-Supplementary_Tables_and_References.pdf [file NIHMS590233-supplement-Supplementary_Tables_and_References.pdf]

**Supplementary Table 1. Platforms, datasets, meta-analysis methods and imputation methods**

| <b>Disease/Trait</b>                                         | <b>Genotyping Platform</b>     | <b>SNPs passing quality control</b> | <b>Datasets</b> | <b>Meta-analysis methods</b> | <b>SNPs<sup>a</sup></b> | <b>Imputed SNPs<sup>b, c</sup></b> |
|--------------------------------------------------------------|--------------------------------|-------------------------------------|-----------------|------------------------------|-------------------------|------------------------------------|
| Bone mineral density- Femoral neck (S19)                     | Affymetrix, Illumina           | ~2.5 million                        | 17              | F                            | 22                      | ~2.5 M                             |
| Bone mineral density- Lumbar spine (S19)                     | Affymetrix, Illumina           | ~2.5 million                        | 16              | F                            | 27                      | ~2.5 M                             |
| Head circumference (infant) (S77)                            | Affymetrix, Illumina           | ~2.4 million                        | 7               | F                            | 3                       | ~2.4 M                             |
| Obesity (childhood) (S9)                                     | Affymetrix, Illumina           | ~2.7 million                        | 14              | F                            | 7                       | ~2.54 M                            |
| Brachial circumference (S7)                                  | Affymetrix, Illumina           | 2,238,430                           | 14              | F                            | 0                       | NR                                 |
| Adiponectin levels (S12)                                     | Affymetrix, Illumina           | NR                                  | 18              | F; R; Bayesian               | 10                      | NR                                 |
| Creatinine-based estimated GFR (S55)                         | Affymetrix, Illumina           | ~2.5 million                        | 26              | F                            | 27                      | ~2.5 M                             |
| Cystatine-based estimated GFR (S55)                          | Affymetrix, Illumina           | ~2.5 million                        | 26              | F                            | 3                       | ~2.5 M                             |
| Chronic kidney disease (S55)                                 | Affymetrix, Illumina           | ~2.5 million                        | 25              | F                            | 2                       | ~2.5 M                             |
| Rheumatoid arthritis (S52)                                   | Affymetrix, Illumina           | 1,948,139                           | 3               | F                            | 7                       | ~2 M                               |
| Platelet count (S59)                                         | Affymetrix, Illumina           | ~2.2 million                        | 7               | F                            | 15                      | ~2.2 M                             |
| Metabolic syndrome (S40)                                     | Illumina                       | 1,257,079                           | 4               | F                            | 1                       | ~0.9 M                             |
| Body mass index (S85)                                        | Affymetrix, Illumina           | 2,474,474                           | 8               | F; P-value-based             | 2                       | NR                                 |
| Menopause (age at onset) (S75)                               | Affymetrix, Illumina           | 2,551,160                           | 22              | F                            | 20                      | ~2.5 M                             |
| Atopic dermatitis (S53)                                      | Affymetrix, Illumina           | ~2.5 million                        | 16              | F; R                         | 2                       | NR                                 |
| Ankle-brachial index (S48)                                   | Affymetrix, Illumina, Perlegen | ~2.5 million                        | 21              | F                            | 1                       | ~2.5 M                             |
| Multiple sclerosis (S54)                                     | Affymetrix, Illumina           | 2,529,394                           | 7               | F; R                         | 9                       | ~2.5 M                             |
| Mean platelet volume (S25)                                   | Affymetrix, Illumina           | ~2.7 million                        | 13              | F                            | 26                      | NR                                 |
| Platelet count (S25)                                         | Affymetrix, Illumina           | ~2.7 million                        | 23              | F                            | 39                      | NR                                 |
| Aortic stiffness (carotid-femoral pulse wave velocity) (S46) | Affymetrix, Illumina           | ~2.5 million                        | 9               | F                            | 1                       | ~2.5 M                             |
| Allergic rhinitis (S60)                                      | Affymetrix, Illumina           | 2,217,510                           | 6               | F                            | 1                       | ~2.2 M                             |
| IgE sensitization to grass (S60)                             | Affymetrix, Illumina           | 2,217,510                           | 6               | F                            | 3                       | ~2.2 M                             |
| Alanine aminotransferase (ALT) (S10)                         | Affymetrix, Illumina, Perlegen | ~2.6 million                        | 14              | F                            | 4                       | NR                                 |
| Alkaline phosphatase (ALP) (S10)                             | Affymetrix, Illumina, Perlegen | ~2.6 million                        | 19              | F                            | 14                      | NR                                 |
| Gamma glutamyl transpeptidase ( $\gamma$ -GT) (S10)          | Affymetrix, Illumina, Perlegen | ~2.6 million                        | 21              | F                            | 26                      | NR                                 |

|                                              |                                |               |    |      |    |        |
|----------------------------------------------|--------------------------------|---------------|----|------|----|--------|
| Lp-PLA2 mass (S26)                           | Affymetrix, Illumina           | 2,661,766     | 4  | F    | 2  | ~2.5 M |
| Lp-PLA2 activity (S26)                       | Affymetrix, Illumina           | 2,661,766     | 3  | F    | 6  | ~2.5 M |
| Height (S49)                                 | Affymetrix, Illumina           | 3,310,998     | 9  | F    | 2  | NR     |
| Type 1 diabetes (S8)                         | Affymetrix, Illumina           | ~2.54 million | 5  | F    | 19 | ~2.5 M |
| Pulmonary function (S70)                     | Affymetrix, Illumina           | ~2.5 million  | 23 | F    | 8  | NR     |
| Bipolar disorder (S64)                       | Affymetrix, Illumina           | 2,415,422     | 11 | F; R | 4  | ~2.5 M |
| Common carotid intima media thickness (S5)   | Affymetrix, Illumina           | ~2.5 million  | 9  | F    | 1  | ~2.5 M |
| Internal carotid intima media thickness (S5) | Affymetrix, Illumina           | ~2.5 million  | 3  | F    | 0  | ~2.5 M |
| Plaque (S5)                                  | Affymetrix, Illumina           | ~2.5 million  | 7  | F    | 3  | ~2.5 M |
| Diastolic blood pressure (S31)               | Affymetrix, Illumina           | ~2.5 million  | 29 | F    | 9  | NR     |
| Systolic blood pressure (S31)                | Affymetrix, Illumina           | ~2.5 million  | 29 | F    | 8  | NR     |
| Pulse pressure (S82)                         | Affymetrix, Illumina, Perlegen | NR            | 35 | F    | 6  | ~0.5 M |
| Mean arterial pressure (S82)                 | Affymetrix, Illumina, Perlegen | NR            | 35 | F    | 9  | ~0.5 M |
| Coffee consumption (S1)                      | Affymetrix, Illumina, Perlegen | ~2.6 million  | 10 | F    | 1  | NR     |
| Type 2 diabetes (S39)                        | Illumina                       | 568,976       | 3  | F    | 1  | NA     |
| Proinsulin levels (S76)                      | Affymetrix, Illumina           | ~2.5 million  | 4  | F    | 7  | ~2.5 M |
| Aging (time to death) (S83)                  | Affymetrix, Illumina           | ~2.5 million  | 9  | F    | 0  | ~2.5 M |
| Aging (time to event) (S83)                  | Affymetrix, Illumina           | ~2.5 million  | 9  | F    | 0  | ~2.5 M |
| Ankylosing spondylitis (S21)                 | Illumina                       | 2,223,620     | 2  | F    | 7  | NR     |
| Sudden cardiac arrest (S3)                   | Affymetrix, Illumina           | ~2.5 million  | 5  | F    | 2  | ~2.5 M |
| White blood cell count (S61)                 | Affymetrix, Illumina           | 2,489,215     | 7  | F    | 3  | ~2.2 M |
| Adiposity (% body fat) (S38)                 | Affymetrix, Illumina, Perlegen | ~2.5 million  | 15 | F    | 2  | NR     |
| Diastolic blood pressure (S35)               | Affymetrix, Illumina           | ~1.7 million  | 8  | F    | 1  | NR     |
| Systolic blood pressure (S35)                | Affymetrix, Illumina           | ~1.7 million  | 8  | F    | 2  | NR     |
| Glioma (S62)                                 | Illumina                       | 424,460       | 4  | F    | 6  |        |
| D-dimer levels (S69)                         | Affymetrix, Illumina           | 2,522,393     | 13 | F    | 3  | ~2.6 M |
| Dehydroepiandrosterone sulphate (S88)        | Affymetrix, Illumina           | ~2.5 million  | 7  | F    | 5  | ~2.5 M |
| Caffeine consumption (S11)                   | Affymetrix, Illumina           | ~2.5 million  | 10 | F    | 2  | ~2.5 M |
| Alcohol consumption (S65)                    | Affymetrix, Illumina, Perlegen | ~2.5 million  | 12 | F    | 0  | NR     |

|                                  |                                |              |    |      |     |        |
|----------------------------------|--------------------------------|--------------|----|------|-----|--------|
| Alzheimer's disease (S28)        | Affymetrix, Illumina           | 496,763      | 4  | F; R | 6   | 0.5 M  |
| Migraine (S42)                   | Affymetrix, Illumina, Perlegen | ~2.5 million | 6  | F    | 0   | ~2.5 M |
| Coronary heart disease (S66)     | Affymetrix, Illumina           | ~2.3 million | 14 | F; R | 13  | ~2.3 M |
| Urinary albumin excretion (S6)   | Affymetrix, Illumina           | ~2.5 million | 12 | F    | 0   | ~2.5 M |
| C-reactive protein (S14)         | Affymetrix, Illumina           | ~2.5 million | 15 | F    | 17  | ~2.5 M |
| Ulcerative colitis (S2)          | Affymetrix, Illumina           | ~1.1 million | 6  | F    | 33  | NR     |
| Parkinson's disease (S32)        | Illumina                       | 7,689,524    | 5  | F; R | 11  | NR     |
| IGF-1 (S34)                      | Affymetrix, Illumina           | ~2.5 million | 4  | F    | 1   | ~2.5 M |
| IGFBP-3 (S34)                    | Affymetrix, Illumina           | ~2.5 million | 4  | F    | 4   | ~2.5 M |
| Personality dimensions (S13)     | Affymetrix, Illumina, Perlegen | ~2.5 million | 10 | F    | 2   | ~2.5 M |
| Renal cell carcinoma (S58)       | Illumina                       | 586,069      | 2  | F    | 6   | NR     |
| Menarche (age at onset) (S18)    | Affymetrix, Illumina           | ~2.5 million | 32 | F    | 42  | ~2.5 M |
| Crohn's disease (S22)            | Affymetrix, Illumina           | 953,241      | 6  | F    | 52  | ~1 M   |
| QRS duration (S72)               | Affymetrix, Illumina           | ~2.5 million | 14 | F    | 25  | ~2.5 M |
| Osteoarthritis (knee) (S20)      | Affymetrix, Illumina           | 2,335,627    | 4  | F    | 0   | NR     |
| Retinal venular caliber (S30)    | Affymetrix, Illumina           | ~2.2 million | 4  | F    | 5   | ~2.2 M |
| Retinal arteriolar caliber (S30) | Affymetrix, Illumina           | ~2.2 million | 4  | F    | 0   | ~2.2 M |
| Waist-hip ratio (S27)            | Affymetrix, Illumina, Perlegen | 2,850,269    | 32 | F; R | 12  | ~2.8 M |
| Body mass index (S73)            | Affymetrix, Illumina, Perlegen | ~2.8 million | 46 | F    | 19  | NR     |
| Urate levels (S86)               | Affymetrix, Illumina           | ~2.5 million | 5  | F    | 8   | ~2.5 M |
| Gout (S86)                       | Affymetrix, Illumina           | ~2.5 million | 5  | F    | 2   | ~2.5 M |
| Height (S41)                     | Affymetrix, Illumina, Perlegen | 2,834,208    | 46 | F    | 115 | ~2.8 M |
| Asthma (S47)                     | Illumina                       | 582,892      | 23 | F; R | 6   | NR     |
| Glycated hemoglobin (S71)        | Affymetrix, Illumina           | ~2.5 million | 23 | F    | 10  | NR     |
| Calcium levels (S50)             | Affymetrix, Illumina           | ~2.5 million | 6  | F    | 1   | ~2.5 M |
| Magnesium levels (S45)           | Affymetrix, Illumina           | ~2.5 million | 3  | F    | 6   | ~2.5 M |
| Sodium (S45)                     | Affymetrix, Illumina           | ~2.5 million | 3  | F    | 0   | ~2.5 M |
| Potassium (S45)                  | Affymetrix, Illumina           | ~2.5 million | 4  | F    | 0   | ~2.5 M |
| Triglycerides (S78)              | Affymetrix, Illumina, Perlegen | ~2.6 million | 46 | F    | 32  | NR     |

|                                                     |                                |              |    |             |    |        |
|-----------------------------------------------------|--------------------------------|--------------|----|-------------|----|--------|
| HDL cholesterol (S78)                               | Affymetrix, Illumina, Perlegen | ~2.6 million | 46 | F           | 47 | NR     |
| LDL total (S78)                                     | Affymetrix, Illumina, Perlegen | ~2.6 million | 46 | F           | 37 | NR     |
| Total cholesterol (S78)                             | Affymetrix, Illumina, Perlegen | ~2.6 million | 46 | F           | 52 | NR     |
| Resting heart rate (RR interval) (S17)              | Affymetrix, Illumina           | ~2.5 million | 15 | F           | 9  | ~2.5 M |
| Type 2 diabetes (S81)                               | Affymetrix, Illumina           | 2,426,886    | 8  | F           | 10 | NR     |
| Phosphorus levels (S36)                             | Affymetrix, Illumina           | ~2.5 million | 4  | F           | 7  | ~2.5 M |
| Vitamin D insufficiency (S84)                       | Affymetrix, Illumina           | 2,548,976    | 5  | F           | 3  | NR     |
| Rheumatoid arthritis (S74)                          | Affymetrix, Illumina           | ~2,716,259   | 6  | F           | 6  | NR     |
| Heart failure (S68)                                 | Affymetrix, Illumina           | 2,478,304    | 4  | F           | 1  | ~2.5 M |
| Cigarettes per day (S79)                            | Affymetrix, Illumina, Perlegen | ~2.5 million | 13 | F; R        | 1  | ~2.5 M |
| Ever vs never smoker (S79)                          | Affymetrix, Illumina, Perlegen | ~2.5 million | 16 | F; R        | 0  | ~2.5 M |
| Former vs current smokers (S79)                     | Affymetrix, Illumina, Perlegen | ~2.5 million | 14 | F; R        | 0  | ~2.5 M |
| Age of smoking initiation (S79)                     | Affymetrix, Illumina, Perlegen | ~2.5 million | 13 | F; R        | 0  | ~2.5 M |
| Birth weight (S23)                                  | Affymetrix, Illumina           | ~2.4 million | 6  | F           | 2  | ~2.4 M |
| Intracranial aneurysm (S87)                         | Illumina                       | 831,534      | 4  | F; Bayesian | 6  | NR     |
| Urinary bladder cancer (S37)                        | Illumina                       | 304,703      | 2  | F           | 0  | NA     |
| Coagulation factor VII (S67)                        | Affymetrix, Illumina           | ~2.6 million | 4  | F           | 5  | ~2.6 M |
| Von Willebrand factor (S67)                         | Affymetrix, Illumina           | ~2.6 million | 5  | F           | 8  | ~2.6 M |
| Coagulation factor VIII (S67)                       | Affymetrix, Illumina           | ~2.6 million | 3  | F           | 5  | ~2.6 M |
| Height (S51)                                        | Illumina                       | 420,885      | 23 | F           | 8  | NR     |
| White blood cell count (S33)                        | Illumina                       | 566,430      | 10 | F           | 5  | NR     |
| Red blood cell count (S33)                          | Illumina                       | 566,430      | 10 | F           | 8  | NR     |
| Hemoglobin (S33)                                    | Illumina                       | 566,430      | 10 | F           | 2  | NR     |
| Hematocrit (S33)                                    | Illumina                       | 566,430      | 10 | F           | 2  | NR     |
| Mean corpuscular volume (S33)                       | Illumina                       | 566,430      | 10 | F           | 15 | NR     |
| Mean corpuscular hemoglobin (S33)                   | Illumina                       | 566,430      | 10 | F           | 15 | NR     |
| Mean corpuscular hemoglobin concentration (S33)     | Illumina                       | 566,430      | 10 | F           | 7  | NR     |
| Platelet count (S33)                                | Illumina                       | 566,430      | 10 | F           | 6  | NR     |
| Gamma glutamyl transpeptidase ( $\gamma$ -GT) (S33) | Illumina                       | 566,430      | 10 | F           | 2  | NR     |

|                                                    |                                |              |    |      |    |        |
|----------------------------------------------------|--------------------------------|--------------|----|------|----|--------|
| Aspartate aminotransferase (AST) (S33)             | Illumina                       | 566,430      | 10 | F    | 2  | NR     |
| Alanine aminotransferase (ALT) (S33)               | Illumina                       | 566,430      | 10 | F    | 2  | NR     |
| Total protein (S33)                                | Illumina                       | 566,430      | 10 | F    | 2  | NR     |
| Blood urea nitrogen (S33)                          | Illumina                       | 566,430      | 10 | F    | 3  | NR     |
| Serum creatinine (S33)                             | Illumina                       | 566,430      | 10 | F    | 1  | NR     |
| Fasting glucose (S16)                              | Affymetrix, Illumina           | ~2.5 million | 21 | F    | 12 | NR     |
| Fasting insulin (S16)                              | Affymetrix, Illumina           | ~2.5 million | 21 | F    | 0  | NR     |
| HOMA-B (S16)                                       | Affymetrix, Illumina           | ~2.5 million | 21 | F    | 3  | NR     |
| HOMA-IR (S16)                                      | Affymetrix, Illumina           | ~2.5 million | 21 | F    | 0  | NR     |
| Major mood disorders (S44)                         | Affymetrix, Illumina, Perlegen | ~2.1 million | 5  | F; R | 1  | ~2.1 M |
| 2h glucose challenge (S63)                         | Affymetrix, Illumina           | NR           | 9  | F    | 3  | NR     |
| PR interval (S57)                                  | Affymetrix, Illumina           | ~2.5 million | 8  | F    | 9  | ~2.5 M |
| Hemoglobin (S24)                                   | Affymetrix, Illumina           | ~2.5 million | 6  | F    | 7  | ~2.5 M |
| Hematocrit (S24)                                   | Affymetrix, Illumina           | ~2.5 million | 6  | F    | 8  | ~2.5 M |
| Mean corpuscular volume (S24)                      | Affymetrix, Illumina           | ~2.5 million | 5  | F    | 16 | ~2.5 M |
| Mean corpuscular hemoglobin (S24)                  | Affymetrix, Illumina           | ~2.5 million | 4  | F    | 9  | ~2.5 M |
| Mean corpuscular hemoglobin concentration (S24)    | Affymetrix, Illumina           | ~2.5 million | 4  | F    | 2  | ~2.5 M |
| Red blood cell count (S24)                         | Affymetrix, Illumina           | ~2.5 million | 4  | F    | 2  | ~2.5 M |
| Atrial fibrillation (S4)                           | Affymetrix, Illumina           | ~2.5 million | 5  | F    | 2  | ~2.5 M |
| Left ventricular mass (S80)                        | Affymetrix, Illumina           | ~2.5 million | 5  | F    | 3  | ~2.5 M |
| Left ventricle internal diastolic dimensions (S80) | Affymetrix, Illumina           | ~2.5 million | 5  | F    | 1  | ~2.5 M |
| Left ventricle wall thickness (S80)                | Affymetrix, Illumina           | ~2.5 million | 5  | F    | 3  | ~2.5 M |
| Left ventricle systolic dysfunction (S80)          | Affymetrix, Illumina           | ~2.5 million | 5  | F    | 1  | ~2.5 M |
| Adiposity- waist circumference (S43)               | Affymetrix, Illumina           | 2,573,738    | 16 | F    | 0  | ~2.5 M |
| Stroke (S29)                                       | Affymetrix, Illumina           | 2,194,468    | 4  | F    | 2  | ~2.5 M |
| Fibrinogen (S15)                                   | Affymetrix, Illumina           | ~2,661,766   | 6  | F    | 4  | ~2.5 M |
| QT interval (S56)                                  | Affymetrix, Illumina           | NR           | 5  | F    | 12 | ~2.5 M |

HOMA-B, homeostatic model assessment beta cell function; HOMA-IR, homeostatic model assessment insulin resistance; Lp-PLA2, lipoprotein-associated phospholipase A2

<sup>a</sup> This column lists the number of SNPs passing the significance threshold used in each GWA meta-analyses.

<sup>b</sup> All studies performed imputations based on HapMap data, except for (S62) that used both HapMap and 1000 Genomes Project data, and (S32) and (S58) that used 1000 Genomes Project data.

<sup>c</sup> All studies performed imputations using some type of hidden Markov model, depending on the specific software used (IMPUTE, MACH, BIMBAM, BEAGLE).

NA, not applicable because no imputation was performed

NR, data not reported

**Supplementary Table 2. Quality control processed for meta-analyses and for constituent studies**

| GWA Report | Eligible meta-analyses, N | QC criteria across individual studies | QC criteria used for including SNPs in the meta-analysis |           |                  |                                                                              |                                                   |
|------------|---------------------------|---------------------------------------|----------------------------------------------------------|-----------|------------------|------------------------------------------------------------------------------|---------------------------------------------------|
|            |                           |                                       | MAF                                                      | Call rate | HWE              | Other                                                                        | Imputation quality                                |
| (S19)      | 2                         | Different                             | ≥ 1%                                                     | NS        | NS               | NS                                                                           | Quality metrics ≥0.3 or 0.4 depending on software |
| (S77)      | 1                         | Different                             | ≥1%                                                      | NS        | NS               | SNPs available in ≥4 datasets                                                | Quality metrics ≥0.3 or 0.4 depending on software |
| (S9)       | 1                         | Common                                | ≥1%                                                      | ≥95%      | 10 <sup>-6</sup> | None                                                                         | Quality metrics ≥0.3 or 0.4 depending on software |
| (S7)       | 1                         | Different                             | ≥1%                                                      | NS        | NS               | NS                                                                           | Quality metrics ≥0.3 or 0.5 depending on software |
| (S12)      | 1                         | Common                                | >1%                                                      | >95%      | 10 <sup>-6</sup> | None                                                                         | Quality metrics ≥0.3 or 0.5 depending on software |
| (S55)      | 3                         | Different                             | ≥1%                                                      | NS        | NS               | NS                                                                           | NS                                                |
| (S52)      | 2                         | Different                             | ≥1%                                                      | NS        | NS               | NS                                                                           | Quality metrics ≥0.5                              |
| (S59)      | 1                         | Different                             | >1%                                                      | >90%      | NS               | Polymorphic SNPs; SNPs mapped to one genomic location                        | Quality metrics ≥ 0.5                             |
| (S40)      | 1                         | Common                                | ≥2%                                                      | ≥95%      | 10 <sup>-4</sup> | None                                                                         | NR                                                |
| (S85)      | 1                         | Different                             | ≥1%                                                      | ≥90%      | 10 <sup>-6</sup> | None                                                                         | Quality metrics ≥0.3 or 0.5 depending on software |
| (S75)      | 1                         | Different                             | ≥1%                                                      | NS        | NS               | NS                                                                           | Quality score ≥0.2                                |
| (S53)      | 1                         | Different                             | ≥1%                                                      | NS        | NS               | None                                                                         | Quality metrics ≥0.4 or 0.5 depending on software |
| (S48)      | 1                         | Different                             | NS                                                       | NS        | NS               | NS                                                                           | NR                                                |
| (S54)      | 1                         | Common                                | >1%                                                      | >95%      | 10 <sup>-6</sup> | None                                                                         | Quality score ≥0.1                                |
| (S25)      | 2                         | Different                             | ≥1%                                                      | ≥90%      | 10 <sup>-6</sup> | None                                                                         | Quality metrics ≥0.4                              |
| (S46)      | 1                         | Different                             | ≥1%                                                      | NS        | NS               | NS                                                                           | Quality metrics ≥0.3                              |
| (S60)      | 2                         | Different                             | NS                                                       | NS        | NS               | NS                                                                           | Quality metrics ≥0.4                              |
| (S10)      | 3                         | Different                             | ≥1%                                                      | NS        | NS               | NS                                                                           | Quality metrics ≥0.3                              |
| (S26)      | 2                         | Different                             | ≥1%                                                      | NS        | NS               | NS                                                                           | NR                                                |
| (S49)      | 1                         | Different                             | ≥1%                                                      | NS        | NS               | MAC (sample size × MAF) ≥ 5                                                  | Quality metrics ≥0.3                              |
| (S8)       | 1                         | Common                                | ≥1%                                                      | ≥95%      | 10 <sup>-5</sup> | None                                                                         | Quality metrics ≥0.3                              |
| (S70)      | 1                         | Different                             | NS                                                       | NS        | NS               | NS                                                                           | Quality metrics ≥0.3                              |
| (S64)      | 1                         | Common                                | ≥1%                                                      | ≥98%      | 10 <sup>-6</sup> | Frequency difference to HapMap <0.15;<br>Missing genotype rate between cases | Quality metrics ≥0.3                              |

|       |   |           |       |      |                     |                                                                   | and controls per SNP <0.02                        |  |
|-------|---|-----------|-------|------|---------------------|-------------------------------------------------------------------|---------------------------------------------------|--|
| (S5)  | 3 | Different | ≥1%   | NS   | NS                  | SNPs available in ≥2 datasets                                     | Quality metrics ≥0.3                              |  |
| (S31) | 2 | Different | NS    | NS   | NS                  | SNPs available in HapMap; SNPs with frequencies similar to HapMap | Quality metrics ≥0.3                              |  |
| (S82) | 2 | Different | NS    | NS   | NS                  | NS                                                                | Quality metrics ≥0.3                              |  |
| (S1)  | 1 | Different | NS    | NS   | NS                  | NS                                                                | Quality metrics ≥0.3                              |  |
| (S39) | 1 | Common    | >1%   | >97% | 10 <sup>-6</sup>    | None                                                              | NA                                                |  |
| (S76) | 1 | Common    | >1%   | >95% | 10 <sup>-6</sup>    | None                                                              | Quality metrics ≥0.3 or 0.4 depending on software |  |
| (S83) | 2 | Different | ≥1%   | NS   | NS                  | NS                                                                | Quality metrics ≥0.3                              |  |
| (S21) | 1 | Common    | ≥0.1% | ≥98% | 5×10 <sup>-20</sup> | Fisher information ≥ 0.975                                        | Quality metrics ≥0.3                              |  |
| (S3)  | 1 | Different | NS    | NS   | NS                  | NS                                                                | NR                                                |  |
| (S61) | 1 | Common    | ≥1%   | ≥95% | NR                  | Polymorphic SNPs; SNPs mapping in one genomic location            | Quality metrics ≥0.5                              |  |
| (S38) | 1 | Different | NS    | NS   | NS                  | NS                                                                | Quality metrics ≥0.3 or 0.4 depending on software |  |
| (S35) | 1 | Different | ≥5%   | NS   | NS                  | Effective sample size >10,000                                     | Quality metrics ≥0.5                              |  |
| (S62) | 1 | Common    | >5%   | >98% | 10 <sup>-5</sup>    | None                                                              | NR                                                |  |
| (S69) | 1 | Different | NS    | NS   | NS                  | NS                                                                | NR                                                |  |
| (S88) | 1 | Different | ≥1%   | NS   | NS                  | NS                                                                | Quality score ≥0.2                                |  |
| (S11) | 1 | Different | ≥2%   | NS   | NS                  | SNPs available in ≥2 datasets                                     | Quality metrics ≥0.7 or 0.8 depending on software |  |
| (S65) | 1 | Different | ≥1%   | NS   | NS                  | NS                                                                | Quality metrics ≥0.5                              |  |
| (S28) | 1 | NR        | NR    | NR   | NR                  | NR                                                                | NR                                                |  |
| (S42) | 1 | Different | NS    | NS   | NS                  | SNPs available in ≥70% of subjects                                | NS                                                |  |
| (S66) | 1 | Different | ≥1%   | ≥98% | 10 <sup>-4</sup>    | None                                                              | Quality metrics ≥0.5                              |  |
| (S6)  | 1 | Different | >1%   | NS   | NS                  | NS                                                                | NS                                                |  |
| (S14) | 1 | Different | NS    | NS   | NS                  | NS                                                                | NS                                                |  |
| (S2)  | 1 | Different | NS    | NS   | NS                  | NS                                                                | NS                                                |  |
| (S32) | 1 | Different | NS    | NS   | NS                  | NS                                                                | Quality metrics ≥0.3                              |  |
| (S34) | 2 | Different | NS    | NS   | NS                  | NS                                                                | NR                                                |  |
| (S13) | 1 | Different | ≥1%   | NS   | NS                  | NS                                                                | Quality metrics ≥0.3                              |  |
| (S58) | 1 | Common    | >5%   | >90% | 10 <sup>-7</sup>    | None                                                              | Quality metrics ≥0.3                              |  |



|       |    |           |            |             |           |                                                                    |                                                         |
|-------|----|-----------|------------|-------------|-----------|--------------------------------------------------------------------|---------------------------------------------------------|
| (S18) | 1  | Different | NS         | NS          | NS        | NS                                                                 | Quality metrics $\geq 0.3$ or 0.4 depending on software |
| (S22) | 1  | Different | NR         | NR          | NR        | NR                                                                 | NR                                                      |
| (S72) | 1  | Different | NS         | NS          | NS        | NS                                                                 | NR                                                      |
| (S20) | 1  | Different | NS         | NS          | NS        | NS                                                                 | NR                                                      |
| (S30) | 2  | Different | NS         | NS          | NS        | NS                                                                 | NR                                                      |
| (S27) | 1  | Different | NS         | NS          | NS        | MAC (sample size $\times$ MAF) $\geq 3$                            | Quality metrics $\geq 0.4$                              |
| (S73) | 1  | Different | NS         | NS          | NS        | MAC (sample size $\times$ MAF) $\geq 6$                            | Quality metrics $\geq 0.3$ or 0.4 depending on software |
| (S86) | 2  | Different | $\geq 2\%$ | NS          | NS        | NS                                                                 | None                                                    |
| (S41) | 1  | Different | None       | NS          | NS        | MAC (sample size $\times$ MAF) $\geq 3$                            | Quality metrics $\geq 0.3$ or 0.4 depending on software |
| (S47) | 1  | Common    | $\geq 1\%$ | NS          | $10^{-4}$ | Genotype missing rate $< 3\%$                                      | NR                                                      |
| (S71) | 1  | Different | NS         | NS          | NS        | NS                                                                 | NR                                                      |
| (S50) | 1  | Different | NS         | NS          | NS        | NS                                                                 | None                                                    |
| (S45) | 3  | Different | NS         | NS          | NS        | NS                                                                 | NS                                                      |
| (S78) | 4  | Different | $\geq 1\%$ | NS          | NS        | NS                                                                 | NR                                                      |
| (S17) | 1  | Different | NS         | NS          | NS        | NS                                                                 | NR                                                      |
| (S81) | 1  | Different | NS         | NS          | NS        | NS                                                                 | NR                                                      |
| (S36) | 1  | Different | NS         | NS          | NS        | NS                                                                 | NR                                                      |
| (S84) | 1  | Different | NS         | NS          | NS        | NS                                                                 | NR                                                      |
| (S74) | 1  | Common    | $\geq 1\%$ | $\geq 95\%$ | $10^{-6}$ | None                                                               | NR                                                      |
| (S68) | 1  | Different | NS         | NS          | NS        | Post meta-analysis population size-weighted MAF $> 0.015$          | NR                                                      |
| (S79) | 4  | Different | $\geq 1\%$ | NS          | NS        | NS                                                                 | Quality metrics $\geq 0.7$                              |
| (S23) | 1  | Different | $\geq 1\%$ | NS          | NS        | NS                                                                 | Quality metrics $\geq 0.3$ or 0.4 depending on software |
| (S87) | 1  | Common    | $\geq 1\%$ | $\geq 95\%$ | $10^{-5}$ | None                                                               | Posterior probability $\geq 0.9$                        |
| (S37) | 1  | Different | NS         | NS          | NS        | $\geq 99.5\%$ consistency between arrays                           | NA                                                      |
| (S67) | 3  | Different | NS         | NS          | NS        | NS                                                                 | NR                                                      |
| (S51) | 1  | Common    | $\geq 1\%$ | $\geq 99\%$ | $10^{-7}$ | Unambiguous clustering of the intensity plots in visual inspection | Quality metrics $> 0.3$                                 |
| (S33) | 14 | Common    | $\geq 1\%$ | $\geq 99\%$ | $10^{-7}$ | Unambiguous clustering of the intensity plots in visual inspection | Quality metrics $> 0.3$                                 |

|       |   |           |     |      |                                     |                            |                                                                                                         |
|-------|---|-----------|-----|------|-------------------------------------|----------------------------|---------------------------------------------------------------------------------------------------------|
| (S16) | 4 | Common    | ≥1% | ≥95% | 10 <sup>-4</sup> - 10 <sup>-6</sup> | None                       | Quality metrics ≥0.3 or 0.4 depending on software                                                       |
| (S44) | 1 | Different | ≥5% | NS   | NS                                  | NS                         | Error rate <0.01                                                                                        |
| (S63) | 1 | Different | >1% | >95% | 10 <sup>-6</sup>                    | None                       | Quality metrics ≥0.3 or 0.4 depending on software                                                       |
| (S57) | 1 | Different | NS  | NS   | NS                                  | NS                         | Quality metrics ≥0.3                                                                                    |
| (S24) | 6 | Different | ≥1% | NS   | NS                                  | NS                         | Observed to expected variance >1.1                                                                      |
| (S4)  | 1 | Different | NS  | NS   | NS                                  | NS                         | NR                                                                                                      |
| (S80) | 4 | Different | NS  | NS   | NS                                  | NS                         | NR                                                                                                      |
| (S43) | 1 | Different | ≥1% | NS   | NS                                  | NS                         | Quality metrics ≥0.3 or 0.4 depending on software;<br>Imputed genotypes with posterior probability >0.9 |
| (S29) | 1 | Different | NS  | NS   | NS                                  | SNPs common in all studies | NR                                                                                                      |
| (S15) | 1 | Different | NS  | NS   | NS                                  | NS                         | NR                                                                                                      |
| (S56) | 1 | Different | NS  | NS   | NS                                  | NS                         | Quality metrics ≥0.3                                                                                    |

<sup>a</sup> In this GWA report, all GWA studies applied common quality control steps except for 1 GWA study (WTCCC) which used an older genotyping platform and which applied MAF ≥1%, call rate ≥99% and HWE P>10<sup>-5</sup> as filtering criteria.

QC, quality control; HWE,, Hardy-Weinberg equilibrium, NS, not specified; NR, not reported

**Supplementary Table 3. Genome-wide significance threshold, heterogeneity testing, and replication process**

| <b>Disease/Trait</b>                                         | <b>Genome-wide significance</b> | <b>Heterogeneity testing</b> | <b>Replication Process</b>                                                                                                                              |
|--------------------------------------------------------------|---------------------------------|------------------------------|---------------------------------------------------------------------------------------------------------------------------------------------------------|
| Bone mineral density- Femoral neck (S19)                     | $P=5 \times 10^{-08}$           | Q, $I^2$                     | Independent SNPs from discovery stage                                                                                                                   |
| Bone mineral density- Lumbar spine (S19)                     | $P=5 \times 10^{-08}$           | Q, $I^2$                     | Independent SNPs from discovery stage                                                                                                                   |
| Head circumference (infant) (S77)                            | $P=5 \times 10^{-08}$           | Q, $I^2$                     | Strongest SNP per locus or a closely correlated proxy SNP                                                                                               |
| Obesity (childhood) (S9)                                     | $P=5 \times 10^{-08}$           | Q                            | All new signals reaching a specified significance threshold                                                                                             |
| Brachial circumference (S7)                                  | $P=5 \times 10^{-08}$           | $I^2$                        | All new signals reaching a specified significance threshold plus biologically plausible SNPs                                                            |
| Adiponectin levels (S12)                                     | $P=5 \times 10^{-07}$ ; BF      | Q, $I^2$                     | NA                                                                                                                                                      |
| Creatinine-based estimated GFR (S55)                         | $P=5 \times 10^{-08}$           | $I^2$                        | SNPs reaching genome-wide significance plus new SNPs plus SNPs based on “direction test”                                                                |
| Cystatine-based estimated GFR (S55)                          | $P=5 \times 10^{-08}$           | $I^2$                        | SNPs reaching genome-wide significance plus new SNPs plus SNPs based on “direction test”                                                                |
| Chronic kidney disease (S55)                                 | $P=5 \times 10^{-08}$           | $I^2$                        | SNPs reaching genome-wide significance plus new SNPs plus SNPs based on “direction test”                                                                |
| Rheumatoid arthritis (S52)                                   | $P=5 \times 10^{-08}$           | NR                           | All new signals reaching a specified significance threshold                                                                                             |
| Platelet count (S59)                                         | $P=5 \times 10^{-08}$           | Q, $I^2$                     | All new signals reaching a specified significance threshold                                                                                             |
| Metabolic syndrome (S40)                                     | $P=5 \times 10^{-08}$           | $I^2$                        | NA                                                                                                                                                      |
| Body mass index (S85)                                        | $P=5 \times 10^{-08}$           | Q                            | SNP reaching a specified significance threshold for the same trait and previously reported SNPs regardless of significance for a correlated trait       |
| Menopause (age at onset) (S75)                               | $P=5 \times 10^{-08}$           | Q                            | Independent SNPs from discovery stage                                                                                                                   |
| Atopic dermatitis (S53)                                      | $P=5 \times 10^{-08}$           | Q                            | Independent SNPs reaching a predetermined significance threshold                                                                                        |
| Ankle-brachial index (S48)                                   | $P=5 \times 10^{-08}$           | Q                            | Independent SNPs reaching genome-wide significance plus independent SNPs reaching a lower significance threshold plus SNPs with bioinformatics support. |
| Multiple sclerosis (S54)                                     | $P=5 \times 10^{-08}$           | Q, $I^2$                     | NA                                                                                                                                                      |
| Mean platelet volume (S25)                                   | $P=5 \times 10^{-08}$           | Q                            | Strongest SNPs per locus                                                                                                                                |
| Platelet count (S25)                                         | $P=5 \times 10^{-08}$           | Q                            | Strongest SNPs per locus                                                                                                                                |
| Aortic stiffness (carotid-femoral pulse wave velocity) (S46) | $P=5 \times 10^{-08}$           | NR                           | SNPs reaching a predetermined significance threshold                                                                                                    |
| Allergic rhinitis (S60)                                      | $P=5 \times 10^{-08}$           | Q                            | NA                                                                                                                                                      |
| IgE sensitization to grass (S60)                             | $P=5 \times 10^{-08}$           | Q                            | NA                                                                                                                                                      |
| Alanine aminotransferase (ALT) (S10)                         | $P=1 \times 10^{-08}$           | Q                            | All independent SNPs reaching a predetermined significance threshold                                                                                    |

|                                                     |                         |                   |                                                                                                                                                                                          |
|-----------------------------------------------------|-------------------------|-------------------|------------------------------------------------------------------------------------------------------------------------------------------------------------------------------------------|
| Alkaline phosphatase (ALP) (S10)                    | $P=1 \times 10^{-08}$   | Q                 | All independent SNPs reaching a predetermined significance threshold                                                                                                                     |
| Gamma glutamyl transpeptidase ( $\gamma$ -GT) (S10) | $P=1 \times 10^{-08}$   | Q                 | All independent SNPs reaching a predetermined significance threshold                                                                                                                     |
| Lp-PLA2 mass (S26)                                  | $P=5 \times 10^{-08}$   | I <sup>2</sup>    | NA                                                                                                                                                                                       |
| Lp-PLA2 activity (S26)                              | $P=5 \times 10^{-08}$   | I <sup>2</sup>    | NA                                                                                                                                                                                       |
| Height (S49)                                        | $P=5 \times 10^{-08}$   | Q, I <sup>2</sup> | SNP reaching a specified significance threshold                                                                                                                                          |
| Type 1 diabetes (S8)                                | $P=5 \times 10^{-08}$   | Q                 | Independent SNPs reaching a predetermined significance threshold and with no evidence of heterogeneity from previously unreported loci.                                                  |
| Pulmonary function (S70)                            | $P=5 \times 10^{-08}$   | Q                 | All new signals reaching a specified significance threshold                                                                                                                              |
| Bipolar disorder (S64)                              | $P=5 \times 10^{-08}$   | Q, I <sup>2</sup> | SNP reaching a specified significance threshold                                                                                                                                          |
| Common cIMT (S5)                                    | $P=5 \times 10^{-08}$   | Q, I <sup>2</sup> | SNP reaching a specified significance threshold                                                                                                                                          |
| Internal cIMT (S5)                                  | $P=5 \times 10^{-08}$   | Q, I <sup>2</sup> | No SNPs eligible for replication                                                                                                                                                         |
| Plaque (S5)                                         | $P=5 \times 10^{-08}$   | Q, I <sup>2</sup> | SNPs reaching a specified significance threshold                                                                                                                                         |
| Diastolic blood pressure (S31)                      | $P=5 \times 10^{-08}$   | NR                | Independent SNPs reaching a specified significance threshold                                                                                                                             |
| Systolic blood pressure (S31)                       | $P=5 \times 10^{-08}$   | NR                | Independent SNPs reaching a specified significance threshold                                                                                                                             |
| Pulse pressure (S82)                                | $P=5 \times 10^{-08}$   | NR                | SNPs reaching a specified significance threshold for a correlated trait                                                                                                                  |
| Mean arterial pressure (S82)                        | $P=5 \times 10^{-08}$   | NR                | SNPs reaching a specified significance threshold for a correlated trait                                                                                                                  |
| Coffee consumption (S1)                             | $P=5 \times 10^{-08}$   | Q                 | SNPs reaching a specified significance threshold                                                                                                                                         |
| Type 2 diabetes (S39)                               | $P=5 \times 10^{-08}$   | Q                 | SNPs reaching a specified significance threshold                                                                                                                                         |
| Proinsulin levels (S76)                             | $P=5 \times 10^{-08}$   | Q, I <sup>2</sup> | Independent SNPs reaching a predetermined significance threshold plus biologically plausible SNPs                                                                                        |
| Aging (time to death) (S83)                         | $P=5 \times 10^{-08}$   | NR                | A subset of the strongest SNPs from discovery stage                                                                                                                                      |
| Aging (time to event) (S83)                         | $P=5 \times 10^{-08}$   | NR                | No SNPs eligible for replication                                                                                                                                                         |
| Ankylosing spondylitis (S21)                        | $P=5 \times 10^{-08}$   | Q                 | Criteria not specified                                                                                                                                                                   |
| Sudden cardiac arrest (S3)                          | $P=5 \times 10^{-08}$   | Q, I <sup>2</sup> | Independent SNPs reaching a predetermined significance threshold                                                                                                                         |
| White blood cell count (S61)                        | $P=2.5 \times 10^{-08}$ | Q, I <sup>2</sup> | Newly identified SNPs                                                                                                                                                                    |
| Adiposity (% body fat) (S38)                        | $P=5 \times 10^{-08}$   | I <sup>2</sup>    | SNPs reaching a predetermined significance threshold                                                                                                                                     |
| Diastolic blood pressure (S35)                      | $P=5 \times 10^{-08}$   | Q                 | Independent SNPs reaching a predetermined significance threshold plus independent SNPs reaching a lower threshold but with consistent association signals across the individual datasets |
| Systolic blood pressure (S35)                       | $P=5 \times 10^{-08}$   | Q                 | Independent SNPs reaching a predetermined significance threshold plus independent SNPs reaching a lower threshold but with consistent association signals across the individual datasets |

|                                       |                       |                   |                                                                                                                                     |
|---------------------------------------|-----------------------|-------------------|-------------------------------------------------------------------------------------------------------------------------------------|
| Glioma (S62)                          | $P=5 \times 10^{-07}$ | Q, I <sup>2</sup> | NA                                                                                                                                  |
| D-dimer levels (S69)                  | $P=5 \times 10^{-08}$ | NR                | NA                                                                                                                                  |
| Dehydroepiandrosterone sulphate (S88) | $P=5 \times 10^{-08}$ | I <sup>2</sup>    | NA                                                                                                                                  |
| Caffeine consumption (S11)            | $P=5 \times 10^{-08}$ | Q, I <sup>2</sup> | NA                                                                                                                                  |
| Alcohol consumption (S65)             | $P=5 \times 10^{-08}$ | NR                | SNPs reaching a predetermined significance threshold plus biologically plausible SNPs                                               |
| Alzheimer's disease (S28)             | $P=5 \times 10^{-08}$ | Q, I <sup>2</sup> | SNPs reaching a predetermined significance threshold                                                                                |
| Migraine (S42)                        | $P=5 \times 10^{-08}$ | NR                | A subset of SNPs reaching a predetermined significance threshold and selected to be maximally informative given the LD between them |
| Coronary heart disease (S66)          | $P=5 \times 10^{-08}$ | Q, I <sup>2</sup> | New SNPs reaching a predetermined significance threshold                                                                            |
| Urinary albumin excretion (S6)        | $P=5 \times 10^{-08}$ | Q, I <sup>2</sup> | Strongest independent SNPs reaching a predetermined significance and MAF threshold                                                  |
| C-reactive protein (S14)              | $P=5 \times 10^{-08}$ | Q                 | SNPs reaching genome-wide significance plus SNPs a lower significance threshold                                                     |
| Ulcerative colitis (S2)               | $P=5 \times 10^{-08}$ | NR                | SNPs reaching a predetermined significance threshold and not previously replicated                                                  |
| Parkinson's disease (S32)             | $P=5 \times 10^{-08}$ | Q, I <sup>2</sup> | SNPs reaching genome-wide significance and quality control in a custom array                                                        |
| IGF-1 (S34)                           | $P=5 \times 10^{-08}$ | NR                | NA                                                                                                                                  |
| IGFBP-3 (S34)                         | $P=5 \times 10^{-08}$ | NR                | NA                                                                                                                                  |
| Personality dimensions (S13)          | $P=5 \times 10^{-08}$ | Q                 | Replication of the SNPs that turned out genome-wide significant was performed in five independent samples                           |
| Renal cell carcinoma (S58)            | $P=5 \times 10^{-07}$ | Q                 | Independent SNPs reaching genome-wide significance                                                                                  |
| Menarche (age at onset) (S18)         | $P=5 \times 10^{-08}$ | Q                 | All newly identified independent SNPs reaching a predetermined significance threshold                                               |
| Crohn's disease (S22)                 | $P=5 \times 10^{-08}$ | Breslow-Day       | SNPs reaching a specified significance threshold                                                                                    |
| QRS duration (S72)                    | $P=5 \times 10^{-08}$ | Q, I <sup>2</sup> | SNPs reaching genome-wide significance in the discovery stage and SNPs reaching a specified significance threshold                  |
| Osteoarthritis (knee) (S20)           | $P=5 \times 10^{-08}$ | Q, I <sup>2</sup> | SNPs reaching a predetermined significance threshold                                                                                |
| Retinal venular caliber (S30)         | $P=5 \times 10^{-08}$ | NR                | Independent genome-wide significant SNPs                                                                                            |
| Retinal arteriolar caliber (S30)      | $P=5 \times 10^{-08}$ | NR                | Independent genome-wide significant SNPs                                                                                            |
| Waist-hip ratio (S27)                 | $P=5 \times 10^{-08}$ | Q, I <sup>2</sup> | Independent SNPs reaching a specified significance threshold                                                                        |
| Body mass index (S73)                 | $P=5 \times 10^{-08}$ | Q                 | Independent SNPs reaching genome-wide significance or a predetermined significance threshold                                        |
| Urate levels (S86)                    | $P=5 \times 10^{-08}$ | NR                | NA                                                                                                                                  |
| Gout (S86)                            | $P=5 \times 10^{-08}$ | NR                | NA                                                                                                                                  |
| Height (S41)                          | $P=5 \times 10^{-08}$ | Q, I <sup>2</sup> | All new signals reaching a specified significance threshold                                                                         |

|                                        |                                    |                     |                                                                                                                                                                |
|----------------------------------------|------------------------------------|---------------------|----------------------------------------------------------------------------------------------------------------------------------------------------------------|
| Asthma (S47)                           | $P=7.2 \times 10^{-08}$            | Q, $I^2$            | NA                                                                                                                                                             |
| Glycated hemoglobin (S71)              | $P=5 \times 10^{-08}$              | Q, $I^2$            | SNPs previously selected by interim analysis                                                                                                                   |
| Calcium levels (S50)                   | $P=5 \times 10^{-08}$              | NR                  | NA                                                                                                                                                             |
| Magnesium levels (S45)                 | $P=5 \times 10^{-08}$              | Q                   | SNPs reaching genome-wide significance plus SNPs reaching a predetermined significance threshold                                                               |
| Sodium (S45)                           | $P=5 \times 10^{-08}$              | Q                   | SNPs reaching genome-wide significance plus SNPs reaching a predetermined significance threshold                                                               |
| Potassium (S45)                        | $P=5 \times 10^{-08}$              | Q                   | SNPs reaching genome-wide significance plus SNPs reaching a predetermined significance threshold                                                               |
| Triglycerides (S78)                    | $P=5 \times 10^{-08}$              | Q                   | Lead SNPs were tested in European and non-European samples                                                                                                     |
| HDL cholesterol (S78)                  | $P=5 \times 10^{-08}$              | Q                   | Lead SNPs were tested in European and non-European samples                                                                                                     |
| LDL cholesterol (S78)                  | $P=5 \times 10^{-08}$              | Q                   | Lead SNPs were tested in European and non-European samples                                                                                                     |
| Total cholesterol (S78)                | $P=5 \times 10^{-08}$              | Q                   | Lead SNPs were tested in European and non-European samples                                                                                                     |
| Resting heart rate (RR interval) (S17) | $P=5 \times 10^{-08}$              | NR                  | NA                                                                                                                                                             |
| Type 2 diabetes (S81)                  | $P=5 \times 10^{-08}$              | Q, $I^2$            | All SNPs reaching a specified significance threshold                                                                                                           |
| Phosphorus levels (S36)                | $P=4 \times 10^{-07}$              | NR                  | Top signals                                                                                                                                                    |
| Vitamin D insufficiency (S84)          | $P=5 \times 10^{-08}$              | NR                  | SNPs reaching a specified significance threshold                                                                                                               |
| Rheumatoid arthritis (S74)             | $P=5 \times 10^{-08}$              | Q                   | SNPs reaching a specified significance threshold plus previously reported SNPs associated with correlated traits plus biologically/functionally plausible SNPs |
| Heart failure (S68)                    | $P=5 \times 10^{-07}$              | NR                  | NA                                                                                                                                                             |
| Cigarettes per day (S79)               | $P=5 \times 10^{-08}$              | $I^2$               | A subset of the most significant SNPs                                                                                                                          |
| Ever vs. never smoker (S79)            | $P=5 \times 10^{-08}$              | $I^2$               | A subset of the most significant SNPs                                                                                                                          |
| Former vs. current smokers (S79)       | $P=5 \times 10^{-08}$              | $I^2$               | A subset of the most significant SNPs                                                                                                                          |
| Age of smoking initiation (S79)        | $P=5 \times 10^{-08}$              | $I^2$               | No SNPs eligible for replication                                                                                                                               |
| Birth weight (S23)                     | $P=5 \times 10^{-08}$              | Q, $I^2$            | Strongest SNP per locus or a closely correlated proxy SNP                                                                                                      |
| Intracranial aneurysm (S87)            | $P=5 \times 10^{-08}$ ;<br>PPA, BF | Q, $I^2$ , $\tau^2$ | The genotyped SNP with the highest PPA plus two additional SNPs per locus for each independent signal                                                          |
| Urinary bladder cancer (S37)           | $P=1.6 \times 10^{-07}$            | Q, $I^2$            | Not previously replicated SNPs                                                                                                                                 |
| Coagulation factor VII (S67)           | $P=5 \times 10^{-08}$              | Q                   | All new signals reaching genome-wide significance                                                                                                              |
| Von Willebrand factor (S67)            | $P=5 \times 10^{-08}$              | Q                   | All new signals reaching genome-wide significance                                                                                                              |
| Coagulation factor VIII (S67)          | $P=5 \times 10^{-08}$              | Q                   | No SNPs eligible for replication                                                                                                                               |

|                                                     |                         |                   |                                                                                                    |
|-----------------------------------------------------|-------------------------|-------------------|----------------------------------------------------------------------------------------------------|
| Height (S51)                                        | $P=5 \times 10^{-08}$   | Q, I <sup>2</sup> | NA                                                                                                 |
| White blood cell count (S33)                        | $P=5 \times 10^{-08}$   | I <sup>2</sup>    | NA                                                                                                 |
| Red blood cell count (S33)                          | $P=5 \times 10^{-08}$   | I <sup>2</sup>    | NA                                                                                                 |
| Hemoglobin (S33)                                    | $P=5 \times 10^{-08}$   | I <sup>2</sup>    | NA                                                                                                 |
| Hematocrit (S33)                                    | $P=5 \times 10^{-08}$   | I <sup>2</sup>    | NA                                                                                                 |
| Mean corpuscular volume (S33)                       | $P=5 \times 10^{-08}$   | I <sup>2</sup>    | NA                                                                                                 |
| Mean corpuscular hemoglobin (S33)                   | $P=5 \times 10^{-08}$   | I <sup>2</sup>    | NA                                                                                                 |
| Mean corpuscular hemoglobin concentration (S33)     | $P=5 \times 10^{-08}$   | I <sup>2</sup>    | NA                                                                                                 |
| Platelet count (S33)                                | $P=5 \times 10^{-08}$   | I <sup>2</sup>    | NA                                                                                                 |
| Gamma glutamyl transpeptidase ( $\gamma$ -GT) (S33) | $P=5 \times 10^{-08}$   | I <sup>2</sup>    | NA                                                                                                 |
| Aspartate aminotransferase (AST) (S33)              | $P=5 \times 10^{-08}$   | I <sup>2</sup>    | NA                                                                                                 |
| Alanine aminotransferase (ALT) (S33)                | $P=5 \times 10^{-08}$   | I <sup>2</sup>    | NA                                                                                                 |
| Total protein (S33)                                 | $P=5 \times 10^{-08}$   | I <sup>2</sup>    | NA                                                                                                 |
| Blood urea nitrogen (S33)                           | $P=5 \times 10^{-08}$   | I <sup>2</sup>    | NA                                                                                                 |
| Serum creatinine (S33)                              | $P=5 \times 10^{-08}$   | I <sup>2</sup>    | NA                                                                                                 |
| Fasting glucose (S16)                               | $P=5 \times 10^{-08}$   | Q, I <sup>2</sup> | All independent SNPs reaching a specified significance threshold plus biologically plausible SNPs  |
| Fasting insulin (S16)                               | $P=5 \times 10^{-08}$   | Q, I <sup>2</sup> | All independent SNPs reaching a specified significance threshold plus biologically plausible SNPs  |
| HOMA-B (S16)                                        | $P=5 \times 10^{-08}$   | Q, I <sup>2</sup> | All independent SNPs reaching a specified significance threshold plus biologically plausible SNPs  |
| HOMA-IR (S16)                                       | $P=5 \times 10^{-08}$   | Q, I <sup>2</sup> | All independent SNPs reaching a specified significance threshold plus biologically plausible SNPs  |
| Major mood disorders (S44)                          | $P=7.2 \times 10^{-08}$ | Q, I <sup>2</sup> | No details on which SNPs were followed-up                                                          |
| 2h glucose challenge (S63)                          | $P=5 \times 10^{-08}$   | Q                 | Independent SNPs reaching a specified significance threshold and SNPs with biological plausibility |
| PR interval (S57)                                   | $P=5 \times 10^{-08}$   | Q, I <sup>2</sup> | NA                                                                                                 |
| Hemoglobin (S24)                                    | $P=5 \times 10^{-08}$   | NR                | SNPs reaching genome-wide significance in the discovery meta-analysis                              |
| Hematocrit (S24)                                    | $P=5 \times 10^{-08}$   | NR                | SNPs reaching genome-wide significance in the discovery meta-analysis                              |
| Mean corpuscular volume (S24)                       | $P=5 \times 10^{-08}$   | NR                | SNPs reaching genome-wide significance in the discovery meta-analysis                              |
| Mean corpuscular hemoglobin (S24)                   | $P=5 \times 10^{-08}$   | NR                | SNPs reaching genome-wide significance in the discovery meta-analysis                              |
| Mean corpuscular hemoglobin                         | $P=5 \times 10^{-08}$   | NR                | SNPs reaching genome-wide significance in the discovery meta-analysis                              |

---

|                                                    |                       |                   |                                                                                                                                      |
|----------------------------------------------------|-----------------------|-------------------|--------------------------------------------------------------------------------------------------------------------------------------|
| concentration (S24)                                |                       |                   |                                                                                                                                      |
| Red blood cell count (S24)                         | $P=5 \times 10^{-08}$ | NR                | SNPs reaching genome-wide significance in the discovery meta-analysis                                                                |
| Atrial fibrillation (S4)                           | $P=5 \times 10^{-08}$ | Q                 | SNPs reaching a predetermined significance threshold and available at a minimum number of datasets                                   |
| Left ventricular mass (S80)                        | $P=5 \times 10^{-07}$ | NR                | Strongest SNP per locus reaching genome-wide significance                                                                            |
| Left ventricle internal diastolic dimensions (S80) | $P=5 \times 10^{-07}$ | NR                | Strongest SNP per locus reaching genome-wide significance                                                                            |
| Left ventricle wall thickness (S80)                | $P=5 \times 10^{-07}$ | NR                | Strongest SNP per locus reaching genome-wide significance                                                                            |
| Left ventricle systolic dysfunction (S80)          | $P=5 \times 10^{-07}$ | NR                | Strongest SNP per locus reaching genome-wide significance                                                                            |
| Adiposity- waist circumference (S43)               | $P=5 \times 10^{-08}$ | Q, I <sup>2</sup> | Independent SNPs reaching a predetermined significance threshold for the same or a correlated trait plus biologically plausible SNPs |
| Stroke (S29)                                       | $P=5 \times 10^{-08}$ | NR                | Independent SNPs reaching genome-wide significance                                                                                   |
| Fibrinogen (S15)                                   | $P=5 \times 10^{-08}$ | NR                | Independent SNPs reaching genome-wide significance                                                                                   |
| QT interval (S56)                                  | $P=5 \times 10^{-08}$ | NR                | Strongest SNP per locus reaching a predetermined significance threshold                                                              |

---

BF, Bayes factor; HOMA-B, homeostatic model assessment beta cell function; HOMA-IR, homeostatic model assessment insulin resistance; Lp-PLA2, lipoprotein-associated phospholipase A2; PPA, posterior probability of association; SNP, single nucleotide polymorphism

NR, not reported

Q: Cochran's Q-statistic



**Supplementary Table 4. Diversity in ancestry and phenotypes and cross-phenotype checks**

| <b>Disease/Trait</b>                                         | <b>Diverse ancestries</b> | <b>Diverse phenotypes</b> | <b>Phenotype cross-checks</b>                                                                                                       |
|--------------------------------------------------------------|---------------------------|---------------------------|-------------------------------------------------------------------------------------------------------------------------------------|
| Bone mineral density- Femoral neck (S19)                     | Yes                       | No                        | Fractures                                                                                                                           |
| Bone mineral density- Lumbar spine (S19)                     | Yes                       | No                        | Fractures                                                                                                                           |
| Head circumference (infant) (S77)                            | No                        | No                        | Intracranial volume in adulthood; trimester fetal head circumference and head circumference at birth; height                        |
| Obesity (childhood) (S9)                                     | No                        | No                        | BMI                                                                                                                                 |
| Brachial circumference (S7)                                  | No                        | No                        | BMI, WHR, weight, T2D, fasting glucose, fasting insulin, HbA1c, 2h glucose test                                                     |
| Adiponectin levels (S12)                                     | Yes                       | No                        | Type 2 diabetes; total cholesterol; LDL; HDL; triglycerides; waist to hip ratio                                                     |
| Creatinine-based estimated GFR (S55)                         | Yes                       | No                        | Urinary albumin-to-creatinine ratio; microalbuminuria; BP; MI                                                                       |
| Cystatine-based estimated GFR (S55)                          | No                        | No                        | Urinary albumin-to-creatinine ratio; microalbuminuria; BP; MI                                                                       |
| Chronic kidney disease (S55)                                 | Yes                       | No                        | Urinary albumin-to-creatinine ratio; microalbuminuria; BP; MI                                                                       |
| Rheumatoid arthritis (S52)                                   | Yes                       | No                        | Systemic lupus erythematosus; Grave's disease                                                                                       |
| Platelet count (S59)                                         | Yes                       | No                        | Platelet aggregation                                                                                                                |
| Metabolic syndrome (S40)                                     | No                        | MetS component traits     | Serum metabolites                                                                                                                   |
| Body mass index (S85)                                        | No                        | No                        | No                                                                                                                                  |
| Menopause (age at onset) (S75)                               | No                        | No                        | No                                                                                                                                  |
| Atopic dermatitis (S53)                                      | No                        | No                        | Asthma; total serum IgE levels                                                                                                      |
| Ankle-brachial index (S48)                                   | No                        | PAD                       | CAD; MI                                                                                                                             |
| Multiple sclerosis (S54)                                     | NR                        | No                        | Crohn's disease, ulcerative colitis, celiac disease, type 1 diabetes, rheumatoid arthritis, systemic lupus erythematosus, psoriasis |
| Mean platelet volume (S25)                                   | Yes                       | No                        | Hb, MCV, RBC                                                                                                                        |
| Platelet count (S25)                                         | Yes                       | No                        | Hb, MCV, RBC                                                                                                                        |
| Aortic stiffness (carotid-femoral pulse wave velocity) (S46) | No                        | No                        | CAD, heart failure, pulse rate, chronic kidney disease, GFR                                                                         |
| Allergic rhinitis (S60)                                      | No                        | No                        | Birth order                                                                                                                         |
| IgE sensitization to grass (S60)                             | No                        | No                        | Birth order                                                                                                                         |

|                                                     |     |                                                        |                                                                                                                                                                                                                       |
|-----------------------------------------------------|-----|--------------------------------------------------------|-----------------------------------------------------------------------------------------------------------------------------------------------------------------------------------------------------------------------|
| Alanine aminotransferase (ALT) (S10)                | Yes | No                                                     | Hepatic steatosis                                                                                                                                                                                                     |
| Alkaline phosphatase (ALP) (S10)                    | Yes | No                                                     | Hepatic steatosis                                                                                                                                                                                                     |
| Gamma glutamyl transpeptidase ( $\gamma$ -GT) (S10) | Yes | No                                                     | Hepatic steatosis                                                                                                                                                                                                     |
| Lp-PLA2 mass (S26)                                  | No  | No                                                     | CAD/CHD                                                                                                                                                                                                               |
| Lp-PLA2 activity (S26)                              | No  | No                                                     | CAD/CHD                                                                                                                                                                                                               |
| Height (S49)                                        | Yes | No                                                     | No                                                                                                                                                                                                                    |
| Type 1 diabetes (S8)                                | No  | No                                                     | No                                                                                                                                                                                                                    |
| Pulmonary function (S70)                            | No  | FEV1, FEV1/FVC                                         | Smoking amount; ever smoking versus never smoking; height; lung cancer                                                                                                                                                |
| Bipolar disorder (S64)                              | No  | No                                                     | Schizophrenia                                                                                                                                                                                                         |
| Common cIMT (S5)                                    | No  | Internal cIMT; plaque                                  | CAD                                                                                                                                                                                                                   |
| Internal cIMT (S5)                                  | No  | No                                                     | No                                                                                                                                                                                                                    |
| Plaque (S5)                                         | No  | Common cIMT; internal cIMT                             | Coronary artery disease                                                                                                                                                                                               |
| Diastolic blood pressure (S31)                      | Yes | Hypertension                                           | Levels of circulating serum metabolites, left ventricular mass, left ventricular wall thickness, incident heart failure, incident and prevalent stroke, prevalent CAD, kidney disease and measures of kidney function |
| Systolic blood pressure (S31)                       | Yes | Hypertension                                           | Levels of circulating serum metabolites, left ventricular mass, left ventricular wall thickness, incident heart failure, incident and prevalent stroke, prevalent CAD, kidney disease and measures of kidney function |
| Pulse pressure (S82)                                | No  | No                                                     | SBP, DPB                                                                                                                                                                                                              |
| Mean arterial pressure (S82)                        | No  | No                                                     | No                                                                                                                                                                                                                    |
| Coffee consumption (S1)                             | No  | No                                                     | No                                                                                                                                                                                                                    |
| Type 2 diabetes (S39)                               | Yes | No                                                     | No                                                                                                                                                                                                                    |
| Proinsulin levels (S76)                             | No  | 32,33-split proinsulin; insulinogenic index; C-peptide | Fasting and 2h glucose and insulin, HOMA-B, HOMA-IR, HbA1c, type 2 diabetes, BMI, CAD                                                                                                                                 |
| Aging (time to death) (S83)                         | No  | Aging (time to event)                                  | No                                                                                                                                                                                                                    |
| Aging (time to event) (S83)                         | NR  | Aging (time to death)                                  | No                                                                                                                                                                                                                    |
| Ankylosing spondylitis (S21)                        | No  | No                                                     | No                                                                                                                                                                                                                    |
| Sudden cardiac arrest (S3)                          | No  | No                                                     | QRS interval, QT interval, RR interval                                                                                                                                                                                |
| White blood cell count (S61)                        | Yes | WBC subtypes                                           | No                                                                                                                                                                                                                    |

|                                       |     |                                                       |                                                                                       |
|---------------------------------------|-----|-------------------------------------------------------|---------------------------------------------------------------------------------------|
| Adiposity (% body fat) (S38)          | Yes | No                                                    | Lipid profiles, indices of insulin sensitivity, fat distribution, leptin, adiponectin |
| Diastolic blood pressure (S35)        | No  | Hypertension                                          | BMI, fasting plasma glucose and lipids, CAD                                           |
| Systolic blood pressure (S35)         | No  | Hypertension                                          | BMI, fasting plasma glucose and lipids, CAD                                           |
| Glioma (S62)                          | No  | No                                                    | No                                                                                    |
| D-dimer levels (S69)                  | NR  | No                                                    | No                                                                                    |
| Dehydroepiandrosterone sulphate (S88) | No  | No                                                    | No                                                                                    |
| Caffeine consumption (S11)            | No  | No                                                    | No                                                                                    |
| Alcohol consumption (S65)             | No  | No                                                    | No                                                                                    |
| Alzheimer's disease (S28)             | No  | Alzheimer's disease age at onset                      | No                                                                                    |
| Migraine (S42)                        | No  | No                                                    | No                                                                                    |
| Coronary heart disease (S66)          | No  | No                                                    | LDL, HDL, total cholesterol, HTN, BMI, type 2 diabetes, smoking                       |
| Urinary albumin excretion (S6)        | Yes | Microalbuminuria, urinary albumin to creatinine ratio | Time to persistent microalbuminuria                                                   |
| C-reactive protein (S14)              | No  | No                                                    | MI, CHD                                                                               |
| Ulcerative colitis (S2)               | No  | No                                                    | Crohn's disease                                                                       |
| Parkinson's disease (S32)             | No  | No                                                    | No                                                                                    |
| IGF-1 (S34)                           | NR  | No                                                    | No                                                                                    |
| IGFBP-3 (S34)                         | NR  | No                                                    | No                                                                                    |
| Personality dimensions (S13)          | No  | Types of personality dimension                        | No                                                                                    |
| Renal cell carcinoma (S58)            | No  | No                                                    | No                                                                                    |
| Menarche (age at onset) (S18)         | No  | No                                                    | BMI, WHR, obesity, height                                                             |
| Crohn's disease (S22)                 | No  | No                                                    | No                                                                                    |
| QRS duration (S72)                    | No  | No                                                    | Conduction defect, PR interval, QT interval                                           |
| Osteoarthritis (knee) (S20)           | Yes | No                                                    | No                                                                                    |
| Retinal venular caliber (S30)         | No  | No                                                    | Central retinal venular equivalent; CAD; stroke; MI, HTN, type 2 diabetes             |
| Retinal arteriolar caliber (S30)      | No  | No                                                    | Central retinal venular equivalent; CAD; stroke; MI, HTN, type 2 diabetes             |

|                                        |     |                     |                                                                                                                                      |
|----------------------------------------|-----|---------------------|--------------------------------------------------------------------------------------------------------------------------------------|
| Waist-hip ratio (S27)                  | No  | No                  | BMI, WC, hip circumference, TGs, LDL, HDL, fasting glucose, fasting insulin, HOMA-IR, 2h glucose, T2D                                |
| Body mass index (S73)                  | No  | Overweighth; obsese | Weight, body fat percentage, type 2 diabetes, 2h glucose, fasting glucose, fasting insulin, HOMA-B, HOMA-IR, HDL, LDL, TGs, height   |
| Urate levels (S86)                     | No  | No                  | SBP, DBP, glucose, Insulin, GFR, CKD, CHD                                                                                            |
| Gout (S86)                             | No  | No                  | SBP, DBP, glucose, Insulin, GFR, CKD, CHD                                                                                            |
| Height (S41)                           | No  | No                  | No                                                                                                                                   |
| Asthma (S47)                           | No  | No                  | Serum IgE                                                                                                                            |
| Glycated hemoglobin (S71)              | No  | No                  | Type 2 diabetes, CAD, fasting glucose, 2h glucose, fasting insulin, HOMA-IR, HOMA-B, 2h-insulin, BMI, Hb, MCH, MCV, transferin, iron |
| Calcium levels (S50)                   | No  | No                  | Serum magnesium, phosphorus, PTH; LS-BMD, FN-BMD; kidney stone disease                                                               |
| Magnesium levels (S45)                 | No  | No                  | GFR, SBP, DBP, fasting glucose, BMD                                                                                                  |
| Sodium (S45)                           | No  | No                  | GFR, SBP, DBP, fasting glucose, BMD                                                                                                  |
| Potassium (S45)                        | No  | No                  | GFR, SBP, DBP, fasting glucose, BMD                                                                                                  |
| Triglycerides (S78)                    | Yes | No                  | CAD, hyperlipidemia, extreme lipid levels                                                                                            |
| HDL cholesterol (S78)                  | Yes | No                  | CAD, hyperlipidemia, extreme lipid levels                                                                                            |
| LDL cholesterol (S78)                  | Yes | No                  | CAD, hyperlipidemia, extreme lipid levels                                                                                            |
| Total cholesterol (S78)                | Yes | No                  | CAD, hyperlipidemia, extreme lipid levels                                                                                            |
| Resting heart rate (RR interval) (S17) | No  | No                  | No                                                                                                                                   |
| Type 2 diabetes (S81)                  | No  | No                  | Fasting glucose, fasting insulin, HOMA-B, HOMA-IR, BMI                                                                               |
| Phosphorus levels (S36)                | No  | No                  | No                                                                                                                                   |
| Vitamin D insufficiency (S84)          | No  | No                  | Clinical vitamin D insufficiency; serum concentrations of vitamin D binding protein                                                  |
| Rheumatoid arthritis (S74)             | No  | No                  | No                                                                                                                                   |
| Heart failure (S68)                    | No  | No                  | No                                                                                                                                   |
| Cigarettes per day (S79)               | No  | No                  | No                                                                                                                                   |
| Ever vs never smoker (S79)             | No  | No                  | No                                                                                                                                   |
| Former vs current smokers (S79)        | No  | No                  | No                                                                                                                                   |
| Age of smoking initiation (S79)        | No  | No                  | No                                                                                                                                   |

|                                                     |     |    |                                                                                                                                                                |
|-----------------------------------------------------|-----|----|----------------------------------------------------------------------------------------------------------------------------------------------------------------|
| Birth weight (S23)                                  | Yes | No | Birth length, birth head circumference, ponderal index, T2D, FPG                                                                                               |
| Intracranial aneurysm (S87)                         | Yes | No | No                                                                                                                                                             |
| Urinary bladder cancer (S37)                        | No  | No | Recurrence-free survival; smoking behavior                                                                                                                     |
| Coagulation factor VII (S67)                        | No  | No | No                                                                                                                                                             |
| Von Willebrand factor (S67)                         | No  | No | No                                                                                                                                                             |
| Coagulation factor VIII (S67)                       | No  | No | No                                                                                                                                                             |
| Height (S51)                                        | No  | No | No                                                                                                                                                             |
| White blood cell count (S33)                        | No  | No | No                                                                                                                                                             |
| Red blood cell count (S33)                          | No  | No | No                                                                                                                                                             |
| Hemoglobin (S33)                                    | No  | No | No                                                                                                                                                             |
| Hematocrit (S33)                                    | No  | No | No                                                                                                                                                             |
| Mean corpuscular volume (S33)                       | No  | No | No                                                                                                                                                             |
| Mean corpuscular hemoglobin (S33)                   | No  | No | No                                                                                                                                                             |
| Mean corpuscular hemoglobin concentration (S33)     | No  | No | No                                                                                                                                                             |
| Platelet count (S33)                                | No  | No | No                                                                                                                                                             |
| Gamma glutamyl transpeptidase ( $\gamma$ -GT) (S33) | No  | No | No                                                                                                                                                             |
| Aspartate aminotransferase (AST) (S33)              | No  | No | No                                                                                                                                                             |
| Alanine aminotransferase (ALT) (S33)                | No  | No | No                                                                                                                                                             |
| Total protein (S33)                                 | No  | No | No                                                                                                                                                             |
| Blood urea nitrogen (S33)                           | No  | No | No                                                                                                                                                             |
| Serum creatinine (S33)                              | No  | No | No                                                                                                                                                             |
| Fasting glucose (S16)                               | No  | No | Fasting insulin, HOMA-B, HOMA-IR, HbA1c, 2h glucose test, 2h insulin test, type 2 diabetes, DBP, SBP, hypertension, LDL, HDL, total cholesterol, triglycerides |
| Fasting insulin (S16)                               | No  | No | Fasting insulin, HOMA-B, HOMA-IR, HbA1c, 2h glucose test, 2h insulin test, type 2 diabetes, DBP, SBP, hypertension, LDL, HDL, total cholesterol, triglycerides |
| HOMA-B (S16)                                        | No  | No | Fasting insulin, HOMA-B, HOMA-IR, HbA1c, 2h glucose test, 2h insulin test, type 2 diabetes, DBP, SBP, hypertension, LDL, HDL, total cholesterol, triglycerides |
| HOMA-IR (S16)                                       | No  | No | Fasting insulin, HOMA-B, HOMA-IR, HbA1c, 2h glucose test, 2h insulin test, type 2 diabetes, DBP, SBP, hypertension, LDL, HDL, total cholesterol, triglycerides |

|                                                    |     |                 |                                                                                |
|----------------------------------------------------|-----|-----------------|--------------------------------------------------------------------------------|
|                                                    |     |                 | 2 diabetes, DBP, SBP, hypertension, LDL, HDL, total cholesterol, triglycerides |
| Major mood disorders (S44)                         | No  | No              | No                                                                             |
| 2h glucose challenge (S63)                         | No  | No              | Insulin secretion indices, T2D                                                 |
| PR interval (S57)                                  | No  | No              | Atrial fibrillation                                                            |
| Hemoglobin (S24)                                   | No  | No              | SBP, DBP, HTN                                                                  |
| Hematocrit (S24)                                   | No  | No              | SBP, DBP, HTN                                                                  |
| Mean corpuscular volume (S24)                      | No  | No              | SBP, DBP, HTN                                                                  |
| Mean corpuscular hemoglobin (S24)                  | No  | No              | SBP, DBP, HTN                                                                  |
| Mean corpuscular hemoglobin concertation (S24)     | No  | No              | SBP, DBP, HTN                                                                  |
| Red blood cell count (S24)                         | No  | No              | SBP, DBP, HTN                                                                  |
| Atrial fibrillation (S4)                           | No  | No              | No                                                                             |
| Left ventricular mass (S80)                        | No  | No              | No                                                                             |
| Left ventricle internal diastolic dimensions (S80) | No  | No              | No                                                                             |
| Left ventricle wall thickness (S80)                | No  | No              | No                                                                             |
| Left ventricle systolic dysfunction (S80)          | No  | No              | No                                                                             |
| Adiposity- waist circumference (S43)               | No  | WHR             | BMI, weight, height, bioimpedance data, DXA, hyperlipidemia, type 2 diabetes   |
| Stroke (S29)                                       | Yes | Stroke subtypes | No                                                                             |
| Fibrinogen (S15)                                   | No  | No              | No                                                                             |
| QT interval (S56)                                  | No  | No              | No                                                                             |

BMD, bone mineral density; BMI, body mass index; CAD, cIMT, carotid intima media thickness; coronary artery disease; CHD, coronary heart disease; DBP, diastolic blood pressure; FEV1, forced expiratory volume in 1 second; FN, femoral neck; FVC, forced vital capacity; GFR, glomerular filtration rate; HbA1c, glycated hemoglobin; HDL, LDL, high density lipoprotein cholesterol; HOMA-B, homeostatic

model assessment beta cell function; HOMA-IR, homeostatic model assessment insulin resistance; HTN, hypertension; LDL, low density lipoprotein cholesterol; Lp-PLA2, lipoprotein-associated phospholipase A2; LS, lumbar spine; MCV, mean corpuscular volume; MetS, metabolic syndrome; MI, myocardial infraction; PTH, parathormone; SBP, systolic blood pressure; TGs, triglycerides; WC, waist circumference; WHR, waist to hip ratio

### Eligible reports of GWA meta-analyses:

- S1. Amin N, Byrne E, Johnson J, Chenevix-Trench G, Walter S, et al. 2012. Genome-wide association analysis of coffee drinking suggests association with CYP1A1/CYP1A2 and NRCAM. *Mol Psychiatry* 17: 1116-29
- S2. Anderson CA, Boucher G, Lees CW, Franke A, D'Amato M, et al. 2011. Meta-analysis identifies 29 additional ulcerative colitis risk loci, increasing the number of confirmed associations to 47. *Nat Genet* 43: 246-52
- S3. Arking DE, Juntila MJ, Goyette P, Huertas-Vazquez A, Eijgelsheim M, et al. 2011. Identification of a sudden cardiac death susceptibility locus at 2q24.2 through genome-wide association in European ancestry individuals. *PLoS Genet* 7: e1002158
- S4. Benjamin EJ, Rice KM, Arking DE, Pfeufer A, van Noord C, et al. 2009. Variants in ZFHX3 are associated with atrial fibrillation in individuals of European ancestry. *Nat Genet* 41: 879-81
- S5. Bis JC, Kavousi M, Franceschini N, Isaacs A, Abecasis GR, et al. 2011. Meta-analysis of genome-wide association studies from the CHARGE consortium identifies common variants associated with carotid intima media thickness and plaque. *Nat Genet* 43: 940-7
- S6. Boger CA, Chen MH, Tin A, Olden M, Kottgen A, et al. 2011. CUBN is a gene locus for albuminuria. *J Am Soc Nephrol* 22: 555-70
- S7. Boraska V, Day-Williams A, Franklin CS, Elliott KS, Panoutsopoulou K, et al. 2012. Genome-wide association study to identify common variants associated with brachial circumference: a meta-analysis of 14 cohorts. *PLoS One* 7: e31369



- S8. Bradfield JP, Qu HQ, Wang K, Zhang H, Sleiman PM, et al. 2011. A genome-wide meta-analysis of six type 1 diabetes cohorts identifies multiple associated loci. *PLoS Genet* 7: e1002293
- S9. Bradfield JP, Taal HR, Timpson NJ, Scherag A, Lecoeur C, et al. 2012. A genome-wide association meta-analysis identifies new childhood obesity loci. *Nat Genet* 44: 526-31
- S10. Chambers JC, Zhang W, Sehmi J, Li X, Wass MN, et al. 2011. Genome-wide association study identifies loci influencing concentrations of liver enzymes in plasma. *Nat Genet* 43: 1131-8
- S11. Cornelis MC, Monda KL, Yu K, Paynter N, Azzato EM, et al. 2011. Genome-wide meta-analysis identifies regions on 7p21 (AHR) and 15q24 (CYP1A2) as determinants of habitual caffeine consumption. *PLoS Genet* 7: e1002033
- S12. Dastani Z, Hivert MF, Timpson N, Perry JR, Yuan X, et al. 2012. Novel loci for adiponectin levels and their influence on type 2 diabetes and metabolic traits: a multi-ethnic meta-analysis of 45,891 individuals. *PLoS Genet* 8: e1002607
- S13. de Moor MH, Costa PT, Terracciano A, Krueger RF, de Geus EJ, et al. 2012. Meta-analysis of genome-wide association studies for personality. *Mol Psychiatry* 17: 337-49
- S14. Dehghan A, Dupuis J, Barbalic M, Bis JC, Eiriksdottir G, et al. 2011. Meta-analysis of genome-wide association studies in >80 000 subjects identifies multiple loci for C-reactive protein levels. *Circulation* 123: 731-8

- S15. Dehghan A, Yang Q, Peters A, Basu S, Bis JC, et al. 2009. Association of novel genetic Loci with circulating fibrinogen levels: a genome-wide association study in 6 population-based cohorts. *Circ Cardiovasc Genet* 2: 125-33
- S16. Dupuis J, Langenberg C, Prokopenko I, Saxena R, Soranzo N, et al. 2010. New genetic loci implicated in fasting glucose homeostasis and their impact on type 2 diabetes risk. *Nat Genet* 42: 105-16
- S17. Eijgelsheim M, Newton-Cheh C, Sotoodehnia N, de Bakker PI, Muller M, et al. 2010. Genome-wide association analysis identifies multiple loci related to resting heart rate. *Hum Mol Genet* 19: 3885-94
- S18. Elks CE, Perry JR, Sulem P, Chasman DI, Franceschini N, et al. 2010. Thirty new loci for age at menarche identified by a meta-analysis of genome-wide association studies. *Nat Genet* 42: 1077-85
- S19. Estrada K, Styrkarsdottir U, Evangelou E, Hsu YH, Duncan EL, et al. 2012. Genome-wide meta-analysis identifies 56 bone mineral density loci and reveals 14 loci associated with risk of fracture. *Nat Genet* 44: 491-501
- S20. Evangelou E, Valdes AM, Kerkhof HJ, Styrkarsdottir U, Zhu Y, et al. 2011. Meta-analysis of genome-wide association studies confirms a susceptibility locus for knee osteoarthritis on chromosome 7q22. *Ann Rheum Dis* 70: 349-55
- S21. Evans DM, Spencer CC, Pointon JJ, Su Z, Harvey D, et al. 2011. Interaction between ERAP1 and HLA-B27 in ankylosing spondylitis implicates peptide handling in the mechanism for HLA-B27 in disease susceptibility. *Nat Genet* 43: 761-7

- S22. Franke A, McGovern DP, Barrett JC, Wang K, Radford-Smith GL, et al. 2010. Genome-wide meta-analysis increases to 71 the number of confirmed Crohn's disease susceptibility loci. *Nat Genet* 42: 1118-25
- S23. Freathy RM, Mook-Kanamori DO, Sovio U, Prokopenko I, Timpson NJ, et al. 2010. Variants in ADCY5 and near CCNL1 are associated with fetal growth and birth weight. *Nat Genet* 42: 430-5
- S24. Ganesh SK, Zakai NA, van Rooij FJ, Soranzo N, Smith AV, et al. 2009. Multiple loci influence erythrocyte phenotypes in the CHARGE Consortium. *Nat Genet* 41: 1191-8
- S25. Gieger C, Radhakrishnan A, Cvejic A, Tang W, Porcu E, et al. 2011. New gene functions in megakaryopoiesis and platelet formation. *Nature* 480: 201-8
- S26. Grallert H, Dupuis J, Bis JC, Dehghan A, Barbalic M, et al. 2012. Eight genetic loci associated with variation in lipoprotein-associated phospholipase A2 mass and activity and coronary heart disease: meta-analysis of genome-wide association studies from five community-based studies. *Eur Heart J* 33: 238-51
- S27. Heid IM, Jackson AU, Randall JC, Winkler TW, Qi L, et al. 2010. Meta-analysis identifies 13 new loci associated with waist-hip ratio and reveals sexual dimorphism in the genetic basis of fat distribution. *Nat Genet* 42: 949-60
- S28. Hollingworth P, Harold D, Sims R, Gerrish A, Lambert JC, et al. 2011. Common variants at ABCA7, MS4A6A/MS4A4E, EPHA1, CD33 and CD2AP are associated with Alzheimer's disease. *Nat Genet* 43: 429-35

- S29. Ikram MA, Seshadri S, Bis JC, Fornage M, DeStefano AL, et al. 2009. Genomewide association studies of stroke. *N Engl J Med* 360: 1718-28
- S30. Ikram MK, Sim X, Jensen RA, Cotch MF, Hewitt AW, et al. 2010. Four novel Loci (19q13, 6q24, 12q24, and 5q14) influence the microcirculation in vivo. *PLoS Genet* 6: e1001184
- S31. International Consortium for Blood Pressure Genome-Wide Association Studies, Ehret GB, Munroe PB, Rice KM, Bochud M, et al. 2011. Genetic variants in novel pathways influence blood pressure and cardiovascular disease risk. *Nature* 478: 103-9
- S32. International Parkinson Disease Genomics Consortium, Nalls MA, Plagnol V, Hernandez DG, Sharma M, et al. 2011. Imputation of sequence variants for identification of genetic risks for Parkinson's disease: a meta-analysis of genome-wide association studies. *Lancet* 377: 641-9
- S33. Kamatani Y, Matsuda K, Okada Y, Kubo M, Hosono N, et al. 2010. Genome-wide association study of hematological and biochemical traits in a Japanese population. *Nat Genet* 42: 210-5
- S34. Kaplan RC, Petersen AK, Chen MH, Teumer A, Glazer NL, et al. 2011. A genome-wide association study identifies novel loci associated with circulating IGF-I and IGFBP-3. *Hum Mol Genet* 20: 1241-51
- S35. Kato N, Takeuchi F, Tabara Y, Kelly TN, Go MJ, et al. 2011. Meta-analysis of genome-wide association studies identifies common variants associated with blood pressure variation in east Asians. *Nat Genet* 43: 531-8

- S36. Kestenbaum B, Glazer NL, Kottgen A, Felix JF, Hwang SJ, et al. 2010. Common genetic variants associate with serum phosphorus concentration. *J Am Soc Nephrol* 21: 1223-32
- S37. Kiemeny LA, Sulem P, Besenbacher S, Vermeulen SH, Sigurdsson A, et al. 2010. A sequence variant at 4p16.3 confers susceptibility to urinary bladder cancer. *Nat Genet* 42: 415-9
- S38. Kilpelainen TO, Zillikens MC, Stancakova A, Finucane FM, Ried JS, et al. 2011. Genetic variation near IRS1 associates with reduced adiposity and an impaired metabolic profile. *Nat Genet* 43: 753-60
- S39. Kooner JS, Saleheen D, Sim X, Sehmi J, Zhang W, et al. 2011. Genome-wide association study in individuals of South Asian ancestry identifies six new type 2 diabetes susceptibility loci. *Nat Genet* 43: 984-9
- S40. Kristiansson K, Perola M, Tikkanen E, Kettunen J, Surakka I, et al. 2012. Genome-wide screen for metabolic syndrome susceptibility Loci reveals strong lipid gene contribution but no evidence for common genetic basis for clustering of metabolic syndrome traits. *Circ Cardiovasc Genet* 5: 242-9
- S41. Lango Allen H, Estrada K, Lettre G, Berndt SI, Weedon MN, et al. 2010. Hundreds of variants clustered in genomic loci and biological pathways affect human height. *Nature* 467: 832-8
- S42. Ligthart L, de Vries B, Smith AV, Ikram MA, Amin N, et al. 2011. Meta-analysis of genome-wide association for migraine in six population-based European cohorts. *Eur J Hum Genet* 19: 901-7

- S43. Lindgren CM, Heid IM, Randall JC, Lamina C, Steinthorsdottir V, et al. 2009. Genome-wide association scan meta-analysis identifies three Loci influencing adiposity and fat distribution. *PLoS Genet* 5: e1000508
- S44. McMahon FJ, Akula N, Schulze TG, Muglia P, Tozzi F, et al. 2010. Meta-analysis of genome-wide association data identifies a risk locus for major mood disorders on 3p21.1. *Nat Genet* 42: 128-31
- S45. Meyer TE, Verwoert GC, Hwang SJ, Glazer NL, Smith AV, et al. 2010. Genome-wide association studies of serum magnesium, potassium, and sodium concentrations identify six Loci influencing serum magnesium levels. *PLoS Genet* 6
- S46. Mitchell GF, Verwoert GC, Tarasov KV, Isaacs A, Smith AV, et al. 2012. Common genetic variation in the 3'-BCL11B gene desert is associated with carotid-femoral pulse wave velocity and excess cardiovascular disease risk: the AortaGen Consortium. *Circ Cardiovasc Genet* 5: 81-90
- S47. Moffatt MF, Gut IG, Demenais F, Strachan DP, Bouzigon E, et al. 2010. A large-scale, consortium-based genomewide association study of asthma. *N Engl J Med* 363: 1211-21
- S48. Murabito JM, White CC, Kavousi M, Sun YV, Feitosa MF, et al. 2012. Association between chromosome 9p21 variants and the ankle-brachial index identified by a meta-analysis of 21 genome-wide association studies. *Circ Cardiovasc Genet* 5: 100-12
- S49. N'Diaye A, Chen GK, Palmer CD, Ge B, Tayo B, et al. 2011. Identification, replication, and fine-mapping of Loci associated with adult height in individuals of african ancestry. *PLoS Genet* 7: e1002298

- S50. O'Seaghdha CM, Yang Q, Glazer NL, Leak TS, Dehghan A, et al. 2010. Common variants in the calcium-sensing receptor gene are associated with total serum calcium levels. *Hum Mol Genet* 19: 4296-303
- S51. Okada Y, Kamatani Y, Takahashi A, Matsuda K, Hosono N, et al. 2010. A genome-wide association study in 19 633 Japanese subjects identified LHX3-QSOX2 and IGF1 as adult height loci. *Hum Mol Genet* 19: 2303-12
- S52. Okada Y, Terao C, Ikari K, Kochi Y, Ohmura K, et al. 2012. Meta-analysis identifies nine new loci associated with rheumatoid arthritis in the Japanese population. *Nat Genet* 44: 511-6
- S53. Paternoster L, Standl M, Chen CM, Ramasamy A, Bonnelykke K, et al. 2012. Meta-analysis of genome-wide association studies identifies three new risk loci for atopic dermatitis. *Nat Genet* 44: 187-92
- S54. Patsopoulos NA, Bayer Pharma MSGWG, Steering Committees of Studies Evaluating I-b, a CCRA, Consortium AN, et al. 2011. Genome-wide meta-analysis identifies novel multiple sclerosis susceptibility loci. *Ann Neurol* 70: 897-912
- S55. Pattaro C, Kottgen A, Teumer A, Garnaas M, Boger CA, et al. 2012. Genome-wide association and functional follow-up reveals new loci for kidney function. *PLoS Genet* 8: e1002584
- S56. Pfeufer A, Sanna S, Arking DE, Muller M, Gateva V, et al. 2009. Common variants at ten loci modulate the QT interval duration in the QTSCD Study. *Nat Genet* 41: 407-14

- S57. Pfeufer A, van Noord C, Marcianti KD, Arking DE, Larson MG, et al. 2010. Genome-wide association study of PR interval. *Nat Genet* 42: 153-9
- S58. Purdue MP, Johansson M, Zelenika D, Toro JR, Scelo G, et al. 2011. Genome-wide association study of renal cell carcinoma identifies two susceptibility loci on 2p21 and 11q13.3. *Nat Genet* 43: 60-5
- S59. Qayyum R, Snively BM, Ziv E, Nalls MA, Liu Y, et al. 2012. A meta-analysis and genome-wide association study of platelet count and mean platelet volume in african americans. *PLoS Genet* 8: e1002491
- S60. Ramasamy A, Curjuric I, Coin LJ, Kumar A, McArdle WL, et al. 2011. A genome-wide meta-analysis of genetic variants associated with allergic rhinitis and grass sensitization and their interaction with birth order. *J Allergy Clin Immunol* 128: 996-1005
- S61. Reiner AP, Lettre G, Nalls MA, Ganesh SK, Mathias R, et al. 2011. Genome-wide association study of white blood cell count in 16,388 African Americans: the continental origins and genetic epidemiology network (COGENT). *PLoS Genet* 7: e1002108
- S62. Sanson M, Hosking FJ, Shete S, Zelenika D, Dobbins SE, et al. 2011. Chromosome 7p11.2 (EGFR) variation influences glioma risk. *Hum Mol Genet* 20: 2897-904
- S63. Saxena R, Hivert MF, Langenberg C, Tanaka T, Pankow JS, et al. 2010. Genetic variation in GIPR influences the glucose and insulin responses to an oral glucose challenge. *Nat Genet* 42: 142-8



- S64. Schizophrenia Psychiatric Genome-Wide Association Study Consortium. 2011. Genome-wide association study identifies five new schizophrenia loci. *Nat Genet* 43: 969-76
- S65. Schumann G, Coin LJ, Lourdasamy A, Charoen P, Berger KH, et al. 2011. Genome-wide association and genetic functional studies identify autism susceptibility candidate 2 gene (AUTS2) in the regulation of alcohol consumption. *Proc Natl Acad Sci U S A* 108: 7119-24
- S66. Schunkert H, Konig IR, Kathiresan S, Reilly MP, Assimes TL, et al. 2011. Large-scale association analysis identifies 13 new susceptibility loci for coronary artery disease. *Nat Genet* 43: 333-8
- S67. Smith NL, Chen MH, Dehghan A, Strachan DP, Basu S, et al. 2010. Novel associations of multiple genetic loci with plasma levels of factor VII, factor VIII, and von Willebrand factor: The CHARGE (Cohorts for Heart and Aging Research in Genome Epidemiology) Consortium. *Circulation* 121: 1382-92
- S68. Smith NL, Felix JF, Morrison AC, Demissie S, Glazer NL, et al. 2010. Association of genome-wide variation with the risk of incident heart failure in adults of European and African ancestry: a prospective meta-analysis from the cohorts for heart and aging research in genomic epidemiology (CHARGE) consortium. *Circ Cardiovasc Genet* 3: 256-66
- S69. Smith NL, Huffman JE, Strachan DP, Huang J, Dehghan A, et al. 2011. Genetic predictors of fibrin D-dimer levels in healthy adults. *Circulation* 123: 1864-72

- S70. Soler Artigas M, Loth DW, Wain LV, Gharib SA, Obeidat M, et al. 2011. Genome-wide association and large-scale follow up identifies 16 new loci influencing lung function. *Nat Genet* 43: 1082-90
- S71. Soranzo N, Sanna S, Wheeler E, Gieger C, Radke D, et al. 2010. Common variants at 10 genomic loci influence hemoglobin A(1)(C) levels via glyceemic and nonglyceemic pathways. *Diabetes* 59: 3229-39
- S72. Sotoodehnia N, Isaacs A, de Bakker PI, Dorr M, Newton-Cheh C, et al. 2010. Common variants in 22 loci are associated with QRS duration and cardiac ventricular conduction. *Nat Genet* 42: 1068-76
- S73. Speliotes EK, Willer CJ, Berndt SI, Monda KL, Thorleifsson G, et al. 2010. Association analyses of 249,796 individuals reveal 18 new loci associated with body mass index. *Nat Genet* 42: 937-48
- S74. Stahl EA, Raychaudhuri S, Remmers EF, Xie G, Eyre S, et al. 2010. Genome-wide association study meta-analysis identifies seven new rheumatoid arthritis risk loci. *Nat Genet* 42: 508-14
- S75. Stolk L, Perry JR, Chasman DI, He C, Mangino M, et al. 2012. Meta-analyses identify 13 loci associated with age at menopause and highlight DNA repair and immune pathways. *Nat Genet* 44: 260-8
- S76. Strawbridge RJ, Dupuis J, Prokopenko I, Barker A, Ahlqvist E, et al. 2011. Genome-wide association identifies nine common variants associated with fasting proinsulin levels and provides new insights into the pathophysiology of type 2 diabetes. *Diabetes* 60: 2624-34

- S77. Taal HR, St Pourcain B, Thiering E, Das S, Mook-Kanamori DO, et al. 2012. Common variants at 12q15 and 12q24 are associated with infant head circumference. *Nat Genet* 44: 532-8
- S78. Teslovich TM, Musunuru K, Smith AV, Edmondson AC, Stylianou IM, et al. 2010. Biological, clinical and population relevance of 95 loci for blood lipids. *Nature* 466: 707-13
- S79. Tobacco Genetics Consortium. 2010. Genome-wide meta-analyses identify multiple loci associated with smoking behavior. *Nat Genet* 42: 441-7
- S80. Vasani RS, Glazer NL, Felix JF, Lieb W, Wild PS, et al. 2009. Genetic variants associated with cardiac structure and function: a meta-analysis and replication of genome-wide association data. *JAMA* 302: 168-78
- S81. Voight BF, Scott LJ, Steinthorsdottir V, Morris AP, Dina C, et al. 2010. Twelve type 2 diabetes susceptibility loci identified through large-scale association analysis. *Nat Genet* 42: 579-89
- S82. Wain LV, Verwoert GC, O'Reilly PF, Shi G, Johnson T, et al. 2011. Genome-wide association study identifies six new loci influencing pulse pressure and mean arterial pressure. *Nat Genet* 43: 1005-11
- S83. Walter S, Atzmon G, Demerath EW, Garcia ME, Kaplan RC, et al. 2011. A genome-wide association study of aging. *Neurobiol Aging* 32: 2109 e15-28

- S84. Wang TJ, Zhang F, Richards JB, Kestenbaum B, van Meurs JB, et al. 2010. Common genetic determinants of vitamin D insufficiency: a genome-wide association study. *Lancet* 376: 180-8
- S85. Wen W, Cho YS, Zheng W, Dorajoo R, Kato N, et al. 2012. Meta-analysis identifies common variants associated with body mass index in east Asians. *Nat Genet* 44: 307-11
- S86. Yang Q, Kottgen A, Dehghan A, Smith AV, Glazer NL, et al. 2010. Multiple genetic loci influence serum urate levels and their relationship with gout and cardiovascular disease risk factors. *Circ Cardiovasc Genet* 3: 523-30
- S87. Yasuno K, Bilguvar K, Bijlenga P, Low SK, Kirschke B, et al. 2010. Genome-wide association study of intracranial aneurysm identifies three new risk loci. *Nat Genet* 42: 420-5
- S88. Zhai G, Teumer A, Stolk L, Perry JR, Vandenput L, et al. 2011. Eight common genetic variants associated with serum DHEAS levels suggest a key role in ageing mechanisms. *PLoS Genet* 7: e1002025
